# Supplementary material
Source: MDPI journal article supplement (https://www.mdpi.com/2077-0472/13/8/1494)
Supplement: s1 [file s1]

**Table S1. Information for CYPs and GSTs in *S. exigua* obtained from the transcriptome data.**

|              | <b>ID</b>     | <b>log<sub>2</sub>(FC)</b> | <b>T/C</b> | <b>Annotation</b> | <b>NCBI Blast</b>                    | <b>GenBank Number</b> | <b>Coverage</b> |
|--------------|---------------|----------------------------|------------|-------------------|--------------------------------------|-----------------------|-----------------|
|              | Unigene_16865 | 0.4538                     | no         | <i>CYP306A1</i>   | <i>CYP306A1[Spodoptera exigua]</i>   | KX443455.1            | 1759/1793(98%)  |
|              | Unigene_16447 | -2.4695                    | no         | <i>CYP321A8</i>   | <i>CYP321A8[Spodoptera exigua]</i>   | KX443441.1            | 1472/1503(98%)  |
|              | Unigene_68447 | -0.9779                    | no         | <i>CYP324A1</i>   | <i>CYP324A1[Spodoptera exigua]</i>   | KX443446.1            | 742/1167(64%)   |
|              | Unigene_20210 | 1.5775                     | up         | <i>CYP333A12</i>  | <i>CYP333A12[Spodoptera exigua]</i>  | KX443479.1            | 2047/2116(97%)  |
|              | Unigene_20462 | -1.5756                    | down       | <i>CYP333B4</i>   | <i>CYP333B4[Spodoptera exigua]</i>   | KX443480.1            | 1656/1706(97%)  |
|              | Unigene_25500 | 3.7734                     | up         | <i>CYP337B5</i>   | <i>CYP337B5[Spodoptera exigua]</i>   | KX443448.1            | 1602/1668(96%)  |
|              | Unigene_21168 | 0.2777                     | no         | <i>CYP339A1</i>   | <i>CYP339A1[Spodoptera exigua]</i>   | KX443482.1            | 1792/1802(99%)  |
|              | Unigene_19946 | 2.7846                     | no         | <i>CYP354A14</i>  | <i>CYP354A14[Spodoptera exigua]</i>  | KX443450.1            | 2167/2218(98%)  |
|              | Unigene_21670 | 0.6031                     | no         | <i>CYP4CG1</i>    | <i>CYP4CG1[Manduca sexta]</i>        | GU731527.1            | 305/459(66%)    |
|              | Unigene_21297 | 6.6599                     | up         | <i>CYP4G74</i>    | <i>CYP4G74[Spodoptera exigua]</i>    | KX443459.1            | 682/902(76%)    |
| <b>P450s</b> | Unigene_349   | 2.0090                     | no         | <i>CYP4G75</i>    | <i>CYP4G75[Spodoptera exigua]</i>    | KX443460.1            | 1973/1985(99%)  |
|              | Unigene_21235 | 1.2324                     | no         | <i>CYP4M14</i>    | <i>CYP4M14[Spodoptera exigua]</i>    | KX443466.1            | 1307/1317(99%)  |
|              | Unigene_19955 | 3.7537                     | up         | <i>CYP6AB14</i>   | <i>CYP6AB14[Spodoptera exigua]</i>   | KX443423.1            | 1600/1612(99%)  |
|              | Unigene_17055 | 8.2566                     | up         | <i>CYP6AB31</i>   | <i>CYP6AB31[Spodoptera exigua]</i>   | KX443424.1            | 1984/2065(96%)  |
|              | Unigene_5595  | 3.1979                     | up         | <i>CYP6AB60</i>   | <i>CYP6AB60[Spodoptera litura]</i>   | MG697223.1            | 1468/1634(90%)  |
|              | Unigene_20067 | -0.2771                    | no         | <i>CYP6AE74</i>   | <i>CYP6AE74[Spodoptera exigua]</i>   | KX443434.1            | 1970/2040(97%)  |
|              | Unigene_4160  | 2.2923                     | no         | <i>CYP6AN4</i>    | <i>CYP6AN4[Spodoptera exigua]</i>    | KX443426.1            | 1785/1848(97%)  |
|              | Unigene_21924 | 1.1907                     | up         | <i>CYP6AW1</i>    | <i>CYP6AW1[Chilo suppressalis]</i>   | KF701139.1            | 983/1410(70%)   |
|              | Unigene_13834 | 4.4932                     | up         | <i>CYP9A186</i>   | <i>CYP9A186[Spodoptera exigua]</i>   | KY348418.1            | 663/673(99%)    |
|              | Unigene_13307 | 9.2197                     | up         | <i>CYP9A27</i>    | <i>CYP9A27[Spodoptera exigua]</i>    | KX443439.1            | 945/949(99%)    |
|              | Unigene_18704 | -1.3938                    | no         | <i>CYP9AJ1</i>    | <i>CYP9AJ3[Helicoverpa armigera]</i> | KM016756.1            | 911/1162(78%)   |
| <b>GSTs</b>  | Unigene_20003 | -1.9013                    | down       | <i>GSTd3</i>      | <i>GSTd3[Spodoptera exigua]</i>      | KF482973.1            | 691/707(98%)    |

---

|               |         |    |               |                                       |            |                |
|---------------|---------|----|---------------|---------------------------------------|------------|----------------|
| Unigene_13134 | 1.3895  | up | <i>GSTd2</i>  | <i>GSTd2 [Spodoptera litura]</i>      | KY411925.1 | 1052/1176(89%) |
| Unigene_18617 | 5.8515  | up | <i>GSTe1</i>  | <i>GSTe10 [Spodoptera littoralis]</i> | MH177589.1 | 498/635(78%)   |
| Unigene_19307 | 2.6091  | no | <i>GSTe10</i> | <i>GSTe13 [Spodoptera littoralis]</i> | MH177592.1 | 581/654(89%)   |
| Unigene_17641 | 0.5337  | no | <i>GSTe12</i> | <i>GSTe14 [Spodoptera littoralis]</i> | MH177593.1 | 574/652(88%)   |
| Unigene_18512 | 0.0866  | no | <i>GSTe13</i> | <i>GSTe1 [Spodoptera littoralis]</i>  | MH177581.1 | 567/653(87%)   |
| Unigene_11347 | 7.5124  | up | <i>GSTe14</i> | <i>GSTe7 [Spodoptera littoralis]</i>  | MH177586.1 | 562/647(87%)   |
| Unigene_19965 | 0.4264  | no | <i>GSTe16</i> | <i>GSTe16 [Spodoptera exigua]</i>     | MH177595.1 | 562/647(87%)   |
| Unigene_15859 | 2.5988  | up | <i>GSTe4</i>  | <i>GSTe12 [Spodoptera litura]</i>     | KF482963.1 | 605/722(84%)   |
| Unigene_21040 | 2.9056  | up | <i>GSTe5</i>  | <i>GSTe4 [Spodoptera litura]</i>      | KF482955.1 | 601/701(86%)   |
| Unigene_20140 | 0.3207  | no | <i>GSTe7</i>  | <i>GSTe5 [Spodoptera litura]</i>      | KF482956.1 | 683/776(88%)   |
| Unigene_18505 | 1.0718  | no | <i>GSTe9</i>  | <i>GSTe9 [Spodoptera exigua]</i>      | KY411934.1 | 624/654(95%)   |
| Unigene_21397 | 0.9671  | no | <i>GSTs1</i>  | <i>GSTs1 [Spodoptera litura]</i>      | HQ667936.1 | 386/448(86%)   |
| Unigene_21445 | 8.0015  | up | <i>GSTs2</i>  | <i>GSTs2 [Spodoptera litura]</i>      | HQ667937.1 | 562/647(87%)   |
| Unigene_21707 | 0.6507  | no | <i>GSTs3</i>  | <i>GSTs3 [Spodoptera litura]</i>      | HQ667938.1 | 606/759(80%)   |
| Unigene_18114 | -1.2213 | no | <i>GSTt1</i>  | <i>GSTt1 [Spodoptera litura]</i>      | KF482976.1 | 668/771(87%)   |
| Unigene_20937 | 2.1011  | up | <i>GSTu1</i>  | <i>GSTu1 [Spodoptera litura]</i>      | HQ667940.1 | 838/1002(84%)  |

---

**Table S2. The corresponding protein sequences from different species for the phylogenetic analysis.**

| Genes | Sympos    | <i>Bombyx mori</i> | <i>Spodoptera littoralis</i> | <i>Spodoptera litura</i> | <i>Spodoptera frugiperda</i> |
|-------|-----------|--------------------|------------------------------|--------------------------|------------------------------|
| CYPs  | CYP306A1  | BAD34476.1         | ACM45975.1                   | XP_022819701.1           | QGA73312.1                   |
|       | CYP321A8  | /                  | CAH1647199.1                 | ATP16105.1               | AGO62006.1                   |
|       | CYP324A1  | XP_037874442.1     | AFP20597.1                   | XP_022834509.1           | XP_050562828.1               |
|       | CYP333A12 | XP_004932126.1     | AFP20609.1                   | XP_022837760.1           | QGA73305.1                   |
|       | CYP333B4  | BAM73887.1         | AFP20610.1                   | XP_022829034.1           | ULR85578.1                   |
|       | CYP337B5  | BAM73901.1         | CAH1643127.1                 | XP_022835182.1           | AID55432.1                   |
|       | CYP339A1  | NP_001121192.1     | CAB3507276.1                 | XP_022827170.1           | XP_035438156.1               |
|       | CYP354A14 | NP_001266295.1     | CAB3508644.1                 | XP_022835312.1           | ULR85498.1                   |
|       | CYP4CG1   | /                  | CAH1646808.1                 | /                        | KAG8117804.1                 |
|       | CYP4G74   | BAM73805.1         | CAB3505815.1                 | XP_022828928.1           | ULR85500.1                   |
|       | CYP4G75   | BAM73802.1         | AFP20598.1                   | XP_022829115.1           | XP_035431180.1               |
|       | CYP4M14   | NP_001103833.1     | CAB3510194.1                 | ABC72321.2               | XP_050554524.1               |
|       | CYP6AB14  | BAM73813.1         | AFP20592.1                   | XP_022824615.1           | ULR85438.1                   |
|       | CYP6AB31  | BAM73814.1         | AFP20591.1                   | XP_022817035.1           | ULR85484.1                   |
|       | CYP6AB60  | ABN71370.1         | CAB3507599.1                 | XP_022824581.1           | XP_035447497.2               |
|       | CYP6AE74  | NP_001104004.1     | CAB3507967.1                 | XP_022824880.1           | QGA73299.1                   |
|       | CYP6AN4   | NP_001266427.1     | AFP20585.1                   | XP_022816422.1           | AGO62003.1                   |
|       | CYP6AW1   | NP_001296520.1     | CAB3516145.1                 | XP_022820166.1           | XP_035436192.2               |
|       | CYP9A186  | /                  | CAB3515416.1                 | AAP80766.1               | QGA73302.1                   |
|       | CYP9A27   | /                  | CAB3515414.1                 | XP_022819612.1           | QGA73301.1                   |
|       | CYP9AJ1   | XP_012546250.1     | CAB3515443.1                 | XP_022830826.1           | XP_035433316.2               |
| GSTs  | GSTd2     | NP_001036974.1     | AYM01151.1                   | XP_022825796.1           | XP_050562946.1               |
|       | GSTd3     | NP_001037546.1     | AYM01149.1                   | XP_022825795.1           | QGA73316.1                   |

|        |                |              |                |                |
|--------|----------------|--------------|----------------|----------------|
| GSTe1  | XP_004930497.3 | AYM01153.1   | XP_022819498.1 | XP_050559253.1 |
| GSTe4  | /              | CAB3515985.1 | XP_022819495.1 | UNG44354.1     |
| GSTe5  | NP_001108465.1 | AYM01156.1   | AIH07580.1     | XP_035447327.2 |
| GSTe7  | NP_001037420.1 | AYM01158.1   | AIH07582.1     | UNG44357.1     |
| GSTe9  | NP_001108466.1 | AYM01160.1   | AIH07584.1     | XP_035428870.1 |
| GSTe10 | /              | AYM01165.1   | AIH07589.1     | XP_050557481.1 |
| GSTe12 | NP_001037197.1 | CAB3506633.1 | AIH07587.1     | KAG8109949.1   |
| GSTe13 | NP_001108460.1 | AYM01164.1   | AIH07588.1     | UNG44348.1     |
| GSTe14 | /              | AYM01165.1   | AIH07589.1     | XP_050557548.1 |
| GSTe16 | XP_037873490.1 | AYM01167.1   | XP_022837684.1 | QGA73324.1     |
| GSTs1  | NP_001037077.1 | AYM01175.1   | AEG75842.1     | QGA73328.1     |
| GSTs2  | NP_001036994.1 | AYM01176.1   | AEG75843.1     | XP_050549798.1 |
| GSTs3  | NP_001037077.1 | AYM01177.1   | AEG75844.1     | QGA73329.1     |
| GSTt1  | NP_001108463.1 | AYM01181.1   | AIH07600.1     | XP_035440418.1 |
| GSTu1  | NP_001108462.1 | AYM01182.1   | XP_022825963.1 | XP_035441082.1 |

---

**Table S3. Information for primers used in RT-qPCR analysis.**

| ID            | Annotation       | Primer Sequences [5'→3']                                           | Amplification Efficiency |
|---------------|------------------|--------------------------------------------------------------------|--------------------------|
| Unigene_16865 | <i>CYP306A1</i>  | For 5' GTGACGAACTCTCGCGGATG 3'<br>Rev 5' GTAACGCCGACGGTTCCTTG 3'   | 91.115%                  |
| Unigene_16447 | <i>CYP321A8</i>  | For 5' ACACGACTTCGCGGACATTG 3'<br>Rev 5' TGCAGAGAGTATACCGGTCGT 3'  | 93.669%                  |
| Unigene_68447 | <i>CYP324A1</i>  | For 5' TCGCTAAGCTGCCGTACTTG 3'<br>Rev 5' TGCATTCCAATGGCGTTGAC 3'   | 92.907%                  |
| Unigene_20210 | <i>CYP333A12</i> | For 5' TCGCGCCATTTCTCACCTTG 3'<br>Rev 5' ACGACCAGGGTTTCAGACTC 3'   | 92.813%                  |
| Unigene_20462 | <i>CYP333B4</i>  | For 5' TTGGTACGGTAGCTCTCGGC 3'<br>Rev 5' AACAGGTCGTGGACGCATTG 3'   | 99.400%                  |
| Unigene_25500 | <i>CYP337B5</i>  | For 5' ACGACACCAACGCTGATCCT 3'<br>Rev 5' CGTGGGGTCCAAACTTAATGCC 3' | 103.881%                 |
| Unigene_21168 | <i>CYP339A1</i>  | For 5' TACGGCCCTGTGGTACGATT 3'<br>Rev 5' CCATTCCTCGCCGTAAGCAG 3'   | 95.321%                  |
| Unigene_19946 | <i>CYP354A14</i> | For 5' GATGACGCGACCGTAGATGC 3'<br>Rev 5' TCGCAAGGAGGTCGTAGTCT 3'   | 92.239%                  |
| Unigene_21670 | <i>CYP4CG1</i>   | For 5' GCAATTCCTTGGTCCTGCAC 3'<br>Rev 5' AACGTGTTTCGATCTCCACCG 3'  | 94.957%                  |
| Unigene_21297 | <i>CYP4G74</i>   | For 5' ATAGCAACGTACGGCATCCA 3'<br>Rev 5' GTCCAGCACTGAAGGGTATGT 3'  | 107.289%                 |
| Unigene_21235 | <i>CYP4M14</i>   | For 5' CAGCGAGCGGTTCTAGAAAG 3'<br>Rev 5' GGCAGCACTGTTATCGTCACT 3'  | 91.391%                  |

|               |                 |                                                                    |          |
|---------------|-----------------|--------------------------------------------------------------------|----------|
| Unigene_19955 | <i>CYP6AB14</i> | For 5' GCTTACCACTCGTGAACGCT 3'<br>Rev 5' AACGTGCACAAGACAGCCAT 3'   | 95.347%  |
| Unigene_17055 | <i>CYP6AB31</i> | For 5' AGAAGGGAGTGATGGTCGGA 3'<br>Rev 5' ACAAACACCTGAGCAGCGAT 3'   | 106.998% |
| Unigene_5595  | <i>CYP6AB60</i> | For 5' CACCCAGTCCAGGTACGTCA 3'<br>Rev 5' CTTCGCTGCTGGCTTTGAGA 3'   | 96.815%  |
| Unigene_20067 | <i>CYP6AE74</i> | For 5' CGCTGATGAGAACAGTGGAGT 3'<br>Rev 5' ATTCAACCACTTGGAGCCTGC 3' | 98.076%  |
| Unigene_4160  | <i>CYP6AN4</i>  | For 5' ACTCAGAGCTGTCTCTCGCT 3'<br>Rev 5' CTTTGCAGCTGGGTTCGAGA 3'   | 100.932% |
| Unigene_21924 | <i>CYP6AW1</i>  | For 5' AATATGGGAGGCGCTGAGTG 3'<br>Rev 5' GCGCACATTTCGGCTATCAAG 3'  | 100.563% |
| Unigene_13834 | <i>CYP9A186</i> | For 5' GGCGAGCTTGGCAGGAATAC 3'<br>Rev 5' CATGCCTTTTGGTGTGTGGTCC 3' | 95.779%  |
| Unigene_13307 | <i>CYP9A27</i>  | For 5' CGCAGAGGTACTAGCGTCAT 3'<br>Rev 5' CCGAAGGGGATGTAGGCATT 3'   | 104.765% |
| Unigene_18704 | <i>CYP9AJ3</i>  | For 5' CTTTGGCCCCGACACATCCTG 3'<br>Rev 5' CCAGAACTTCTCGTCCCGGT 3'  | 101.500% |
| Unigene_20003 | <i>GSTd3</i>    | For 5' CCAACAGCGTACTTGTTCCT 3'<br>Rev 5' TTCGACTTGGGCACGCTGTA 3'   | 105.468% |
| Unigene_13134 | <i>GSTd2</i>    | For 5' GTTGAGAGCCTTTGCGGTGA 3'<br>Rev 5' ACGCGCTGTGTTTCTTGTC 3'    | 93.761%  |
| Unigene_18617 | <i>GSTe1</i>    | For 5' TAAACCTTCAGGCCGAGAAC 3'<br>Rev 5' ACCAAGAGTCGTCCTTTCCG 3'   | 93.066%  |
| Unigene_19307 | <i>GSTe10</i>   | For 5' CTTGCACACCAGGCAAATTCC 3'<br>Rev 5' GCTCGCAGGGGAGTCAATAAC 3' | 96.580%  |

|               |               |                                                                   |          |
|---------------|---------------|-------------------------------------------------------------------|----------|
| Unigene_17641 | <i>GSTe12</i> | For 5' TCACCTGGCTTCCCTCGAAT 3'<br>Rev 5' TCGTACAGAGCCTTTGCACCT 3' | 104.651% |
| Unigene_18512 | <i>GSTe13</i> | For 5' TTCAGAAGGTGCCGTGTCTT 3'<br>Rev 5' TCGATTGGAAACAGTACGCCA 3' | 97.848%  |
| Unigene_11347 | <i>GSTe14</i> | For 5' GCACGCGCTACACTAATCCT 3'<br>Rev 5' CTCAGGGCTGAATTGTTGCC 3'  | 107.779% |
| Unigene_19965 | <i>GSTe16</i> | For 5' AAGGGATGCATGGAGATGGC 3'<br>Rev 5' AGGCAGATATCGACGAAGCG 3'  | 96.952%  |
| Unigene_15859 | <i>GSTe4</i>  | For 5' ACTGTTCCGATGCTAGCTGAC 3'<br>Rev 5' TCTTGCCGTATTCGTCACCA 3' | 95.207%  |
| Unigene_21040 | <i>GSTe5</i>  | For 5' TTTGCGTCATGTCGGTGTCT 3'<br>Rev 5' ATCGCTGAGCATCATCACGG 3'  | 100.399% |
| Unigene_20140 | <i>GSTe7</i>  | For 5' GCGGATTTGAGCATAGCGTC 3'<br>Rev 5' CCGTCGGAATGTTCTTTGCC 3'  | 98.715%  |
| Unigene_18505 | <i>GSTe9</i>  | For 5' GTGACATGGTCACCAGCGAT 3'<br>Rev 5' ATGCAGCTGTCGTGTTCCAA 3'  | 93.208%  |
| Unigene_21397 | <i>GSTs1</i>  | For 5' ACTCTGAGCGTACGTCTTGC 3'<br>Rev 5' CTGCTACTGGCTTTTCGGTGA 3' | 109.673% |
| Unigene_21445 | <i>GSTs2</i>  | For 5' CGTCGACCTCATCAACGACC 3'<br>Rev 5' TCCAACATGGCAGGGAACAC 3'  | 100.198% |
| Unigene_21707 | <i>GSTs3</i>  | For 5' AGCCCATCCGTCTACTGCTA 3'<br>Rev 5' CTGAGCGTATCTCTTGCCGT 3'  | 102.756% |
| Unigene_18114 | <i>GSTt1</i>  | For 5' ATTCACAAGCTGCCACCAAG 3'<br>Rev 5' CTGGGTACAAGAGCCGCAT 3'   | 97.489%  |
| Unigene_20937 | <i>GSTu1</i>  | For 5' CCCTCAGCGGTGATACTCCA 3'<br>Rev 5' TCCCTCTCATCAACGCCACT 3'  | 100.294% |

|       |                                                                            |         |
|-------|----------------------------------------------------------------------------|---------|
| GAPDH | For 5' CTGAGGAACAGGTCGTGTCATCCGA 3'<br>Rev 5' GATCGATAACGCGGTTGGAGTAGCC 3' | 95.271% |
| L7A   | For 5' TGAGCTTGTCTCTTCCTGCCC 3'<br>Rev 5' GCTGCACGGTCGCCAGACTC 3'          | 98.524% |
